# Supplementary material for: SPOC domain-containing protein Leaf inclination3 interacts with LIP1 to regulate rice leaf inclination through auxin signaling
Source: PubMed Central journal article supplement (PMC6289470; doi:10.1371/journal.pgen.1007829), 2018-11-29
Supplement: pgen.1007829.s001.pdf [file pgen.1007829.s001.pdf]

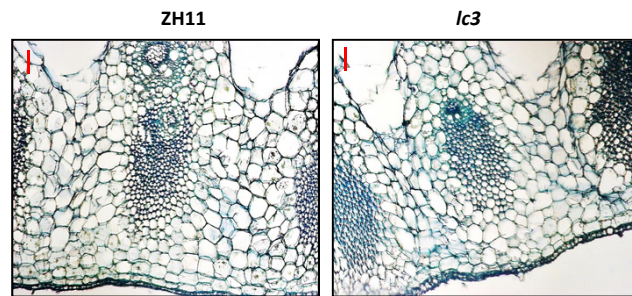

**S1 Fig. *lc3* plant presents enlarged cell width at adaxial side of the flag leaf collar.** The cross-sections of the adaxial region of ZH11 and *lc3* flag leaf collars at 10 days after heading were shown. Bar=50  $\mu$ m.
