# Supplementary material for: SPOC domain-containing protein Leaf inclination3 interacts with LIP1 to regulate rice leaf inclination through auxin signaling
Source: PubMed Central journal article supplement (PMC6289470; doi:10.1371/journal.pgen.1007829), 2018-11-29
Supplement: pgen.1007829.s004.pdf [file pgen.1007829.s004.pdf]

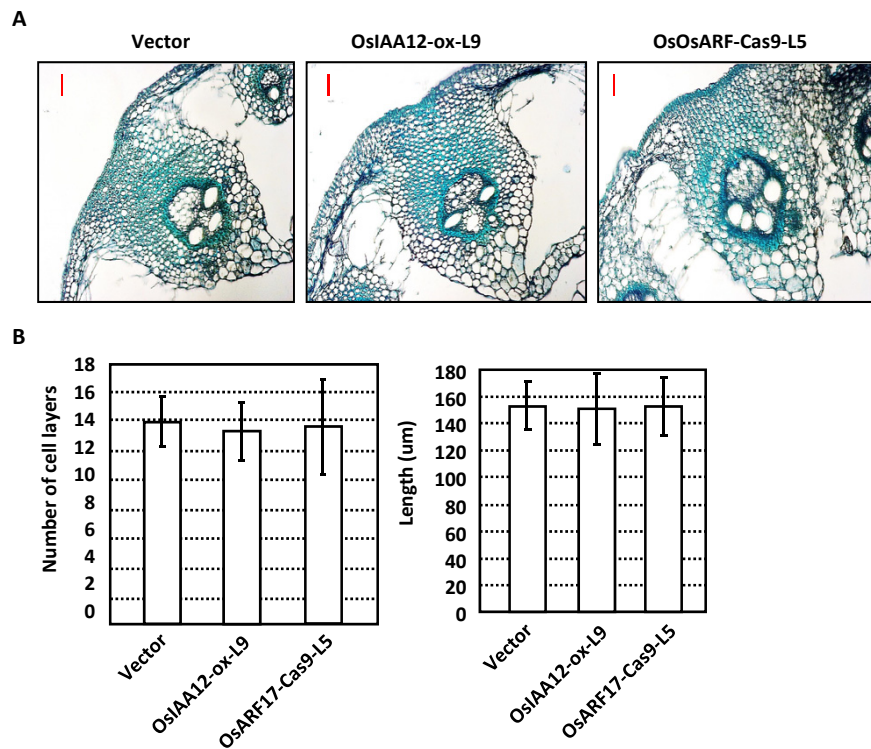

**S4 Fig. Rice plants overexpressing *OsIAA12* or deficiency of *OsARF17* present no change in abaxial region of flag leaf collar.**

- A. The cross-sections of the abaxial region of the flag leaf collar of rice plants overexpressing *OsIAA12* or deficiency of *OsARF17* by Crispr/Cas9 at 10 days after heading. Bar=50 μm.
- B. The number of cell layers (left) and cell length (right) of abaxial region of collar (shown in S4A) were calculated and statistical analysis by using Student's t-test revealed no differences. Data are shown as means ± SD (n>30).
