# Supplementary material for: SPOC domain-containing protein Leaf inclination3 interacts with LIP1 to regulate rice leaf inclination through auxin signaling
Source: PubMed Central journal article supplement (PMC6289470; doi:10.1371/journal.pgen.1007829), 2018-11-29
Supplement: pgen.1007829.s005.pdf [file pgen.1007829.s005.pdf]

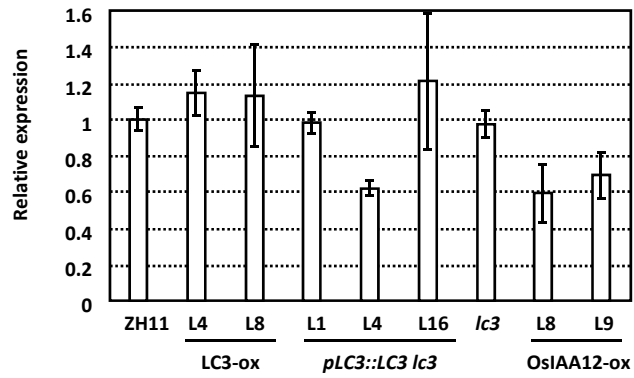

**S5 Fig. The expression of *OsARF17* in *lc3* with complemented *LC3* expression, *LC3* overexpression, *lc3* and *OsIAA12* overexpression plants.** Transcription levels of *OsARF17* were normalized with that of *Actin* and relative expressions were calculated by setting the *OsARF17* expression level in ZH11 as “1.0”. Experiments were biologically repeated three times and data are presented as means  $\pm$  SE (n>3).
