# Supplementary material for: SPOC domain-containing protein Leaf inclination3 interacts with LIP1 to regulate rice leaf inclination through auxin signaling
Source: PubMed Central journal article supplement (PMC6289470; doi:10.1371/journal.pgen.1007829), 2018-11-29
Supplement: pgen.1007829.s006.pdf [file pgen.1007829.s006.pdf]

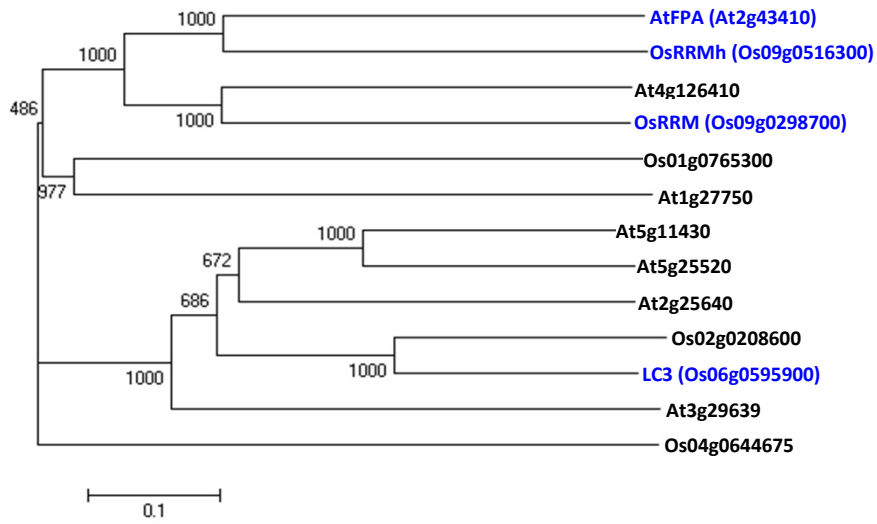

**S6 Fig. Phylogenetic tree of the SPOC domain-containing proteins in rice and *Arabidopsis*.** Protein sequences were obtained from NCBI, and characterized OsRRM, OsRRMh, and AtFPA were indicated. Phylogenetic tree was generated using MEGA3 software.
