# Supplementary material for: SPOC domain-containing protein Leaf inclination3 interacts with LIP1 to regulate rice leaf inclination through auxin signaling
Source: PubMed Central journal article supplement (PMC6289470; doi:10.1371/journal.pgen.1007829), 2018-11-29
Supplement: pgen.1007829.s007.pdf [file pgen.1007829.s007.pdf]

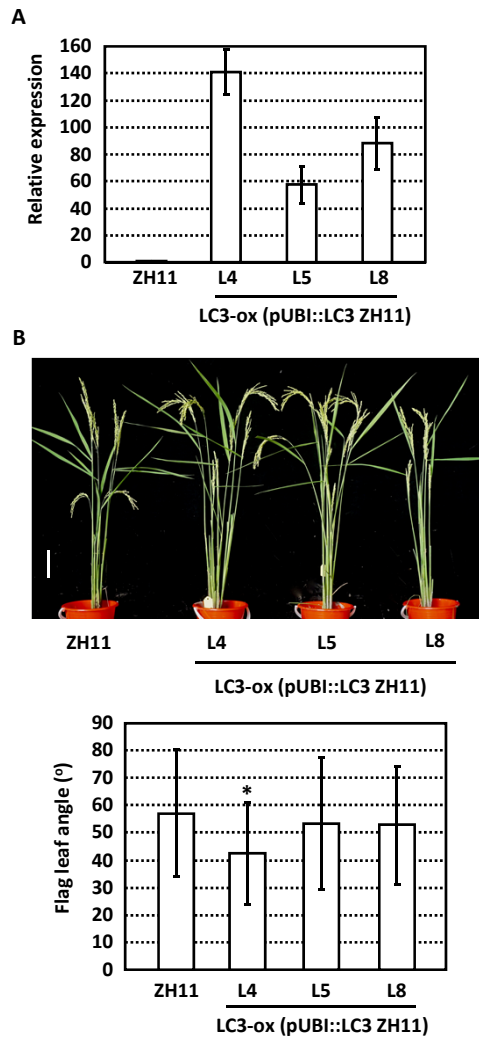

**S7 Fig. *LC3* overexpression does not change rice leaf inclination.**

- A. qRT-PCR analysis confirms the enhanced *LC3* expression in ZH11 plants transformed with pUBI::*LC3*. Lamina joint of flag leaf at 10 days after heading was analyzed. Transcript levels of *LC3* were normalized with that of *Actin* and *LC3* expression in ZH11 flag leaf was set as 1.0. Analyses were repeated three times and data are shown as means  $\pm$  SD (n>3).
- B. Phenotypic observations (upper, bar=10 cm) and measurement (bottom) show that enhanced *LC3* expression does not alter the leaf inclination. Angles of rice flag leaf at 10 days after heading were measured and statistically analyzed by using Student's *t*-test. Experiments were repeated three times and data are presented as means  $\pm$  SD (n>30; \*,  $p < 0.05$ ).
