# Supplementary material for: SPOC domain-containing protein Leaf inclination3 interacts with LIP1 to regulate rice leaf inclination through auxin signaling
Source: PubMed Central journal article supplement (PMC6289470; doi:10.1371/journal.pgen.1007829), 2018-11-29
Supplement: pgen.1007829.s008.pdf [file pgen.1007829.s008.pdf]

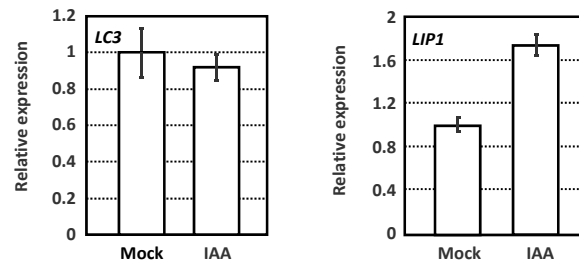

**S8 Fig. Expression of *LC3* and *LIP1* is not regulated by auxin treatment.** Seven-day-old seedlings grown in normal culture solution were treated with 10  $\mu$ M indole-3-acetic acid (IAA) for 2 h. Transcription levels of *LC3* and *LIP1* were normalized with that of *Actin* and relative expressions were calculated by setting the expression of corresponding genes in Mock as “1.0”. Experiments were biologically repeated three times and data are presented as means  $\pm$  SE (n>3).
