# Supplementary material for: SPOC domain-containing protein Leaf inclination3 interacts with LIP1 to regulate rice leaf inclination through auxin signaling
Source: PubMed Central journal article supplement (PMC6289470; doi:10.1371/journal.pgen.1007829), 2018-11-29
Supplement: pgen.1007829.s009.pdf [file pgen.1007829.s009.pdf]

**S1 Table. Primers used for qRT-PCR and plasmid construction.** Restriction endonuclease sites are underlined

| Primers  | Sequences (5'-3')                             | Restriction enzymes |
|----------|-----------------------------------------------|---------------------|
| Actin-1  | CCTTCAACACCCCTGCTATG                          |                     |
| Actin-2  | TGAGTAACCACGCTCCGTCA                          |                     |
| LC3-1    | GGTGAAAAGACATCCACAAACGA                       |                     |
| LC3-2    | TATGAGTCAATGGTCCGCAAGA                        |                     |
| LC3-3    | CCCAAGCTTACGGGTGATGGGCTCTTGGAG                | <i>Hind</i> III     |
| LC3-4    | CCCAAGCTTCCAGCAACTACCTAAGCGG                  | <i>Hind</i> III     |
| LC3-5    | GGAATTCATATGACTACTGAAGAACTCGCTTCAA            | <i>Nde</i> I        |
| LC3-6    | TCCCCGGGCTACTGTAGGTTCCAAGGCATGG               | <i>Sma</i> I        |
| LC3-7    | CCCATATGATGACTACTGAAGAACTCGC                  | <i>Nde</i> I        |
| LC3-8    | CGAGCTCGCTGTAGGTTCCAAGGCATGG                  | <i>Sac</i> I        |
| LC3-9    | TGGTCGACGTA TAGTATGACTACTGAAGAACTCGC          | <i>Spe</i> I        |
| LC3-10   | GCTCACCATCACTAGTACCTGTAGGTTCCAAGGCATGG        | <i>Spe</i> I        |
| LC3-11   | CCCAAGCTTACGGGTGATGGGCTCTTGGAG                | <i>Hind</i> III     |
| LC3-12   | AAGCGGCCGCTCTAGATGAACATAGGCGTTTGGGTG          | <i>Xba</i> I        |
| LC3-13   | ACGCGTCGACAAATGACTACTGAAGAACTCGCTT            | <i>Sal</i> I        |
| LC3-14   | ACGCGTCGACAACTACTGTAGGTTCCAAGGCAT             | <i>Sal</i> I        |
| LC3-15   | GCGTCGACATGACTACTGAAGAACTCGC                  | <i>Sal</i> I        |
| LC3-16   | GGGGTACCCTGTAGGTTCCAAGGCATGG                  | <i>Kpn</i> I        |
| LIP1-1   | GGAATTCATGGAGAGGGAAGTCGTGGTC                  | <i>EcoR</i> I       |
| LIP1-2   | CGGGATCCAATCTCCTCAATAAGAACCTTGG               | <i>BamH</i> I       |
| LIP1-3   | GCGTCGACATGGAGAGGGAAGTCGTGGTC                 | <i>Sal</i> I        |
| LIP1-4   | GGACTAGTAATCTCCTCAATAAGAACCTTGG               | <i>Spe</i> I        |
| LIP1-5   | GGCAGTCGTGGTCTCCGAGGACG                       |                     |
| LIP1-6   | AAACCGTCCTCGGAGACCACGAC                       |                     |
| LIP1-7   | GCCGTTCTCCCTCGCGAAACCA                        |                     |
| LIP1-8   | AAACTGGTTTCCGCGAGGGAGAA                       |                     |
| LIP1-9   | GGAAACCAGGGTCATCTGCC                          |                     |
| LIP1-10  | TGACTCATCTTCGCCTTCTGA                         |                     |
| IAA12-1  | GCCGTACCTGAGGAAGATCG                          |                     |
| IAA12-2  | TTGCCTGGTGATCCTAGCC                           |                     |
| IAA12-3  | CGGGATCCATGGAAGCCGCCGTGGGGTA                  | <i>BamH</i> I       |
| IAA12-4  | GGGGTACCGATCTTCATTTGCCTTGGTG                  | <i>Kpn</i> I        |
| IAA12-5  | CGGAATTCATGGAAGCCGCCGTGGGGTA                  | <i>EcoR</i> I       |
| IAA12-6  | GCGTCGACGATCTTCATTTGCCTTGGTGATCC              | <i>Sal</i> I        |
| IAA12-7  | GCGTCGACATGGAAGCCGCCGTGGGGTA                  | <i>Sal</i> I        |
| IAA12-8  | GGACTAGTGATCTTCATTTGCCTTGGTGATCC              | <i>Spe</i> I        |
| IAA12-9  | GATTTCTGAGGAGGATCTTCCCGGGGAAGCCGCCGTGGGGTACGC | <i>Sma</i> I        |
| IAA12-10 | AAGCAGGGCATGCCTGCAGGTCGACTTAGATCTTCATTTGCCTTG | <i>Sal</i> I        |
| IAA12-11 | ACTCACTATAGGGCGAATCTCATAATTTATATTCCCAAT       | <i>EcoR</i> I       |
| IAA12-12 | ATTCGCGAACCGGTGAGCTCTGCTTGATTTCTGGTGACC       | <i>Sac</i> I        |

|          |                                                     |                |
|----------|-----------------------------------------------------|----------------|
| IAA12-13 | ACTCACTATAGGGCGAATTCGGTGCACCAGAAATCAAGCA            | <i>EcoR</i> I  |
| IAA12-14 | ATTCGCGAACCGGTGAGCTCTTCTCGCTTCTCTCTAGCT             | <i>Sac</i> I   |
| IAA12-15 | GGGGTACCCACCGCAGTCATCTCGCTAT                        | <i>Kpn</i> I   |
| IAA12-16 | TTGCGGCCGCTTCTCGCTTCTCTCTAGCT                       | <i>Not</i> I   |
| IAA12-17 | GATCAATAGGGCCGAAAGGG                                |                |
| IAA12-18 | GTTGATACAGAGACATAGTG                                |                |
| IAA12-19 | AATTTCCGGGTTACCGGAT                                 |                |
| IAA12-20 | CTTGATTATAAGGGTGTGGA                                |                |
| IAA12-21 | ATGGGACATAATAATTTAAA                                |                |
| IAA12-22 | GGGTTCATATTCTATTCCCC                                |                |
| IAA12-23 | CGGCGTGGCCCGGCGACCGG                                |                |
| IAA12-24 | GAGGAGTGCAAGTTTTATAG                                |                |
| IAA12-25 | TATAAACTTGCACTCCTCC                                 |                |
| IAA12-26 | TTCTCGCTTCTCTCTAGCT                                 |                |
| IAA12-27 | CGCCGCCGACAGCCTCATCA                                |                |
| IAA12-28 | TGCTCGTCGTCGTCGGCGGC                                |                |
| GH3.2-1  | GGGGAGAGGAAGCTAATGCC                                |                |
| GH3.2-2  | CTGCGCGTACATGGACTGGA                                |                |
| GH3.2-3  | GCCGCCACCCCGCGAGTCC                                 |                |
| GH3.2-4  | TGTATCTGTAAATTTATCGT                                |                |
| GH3.2-5  | TTGACTCACGAGAGGTTA                                  |                |
| GH3.2-6  | CCGTGTCTTGACTTGTGC                                  |                |
| GH3.2-7  | GTAAAACACGTTTGGCTCTT                                |                |
| GH3.2-8  | TAGTGGTACTTGTACGGCTG                                |                |
| GH3.2-9  | CGCGACGTGCATGGCGCG                                  |                |
| GH3.2-10 | ATTAGTTGGCGTTGCTTGCC                                |                |
| GH3.2-11 | CCAAATACAGCCCGCACAAG                                |                |
| GH3.2-12 | ACTGGGACTGAGTGCTGGTA                                |                |
| ARF17-1  | GGCAAGGCAACGAAACAAGGGGAC                            |                |
| ARF17-2  | AAACGTCCCCTTGTTCGTTGCCT                             |                |
| ARF17-3  | AGGAGGACCTGCATATGATGAGGCTTTCGTCGTCGTC               | <i>Nde</i> I   |
| ARF17-4  | GCAGGTCGACGGATCCGAATTCAACTGAGCCGACAGATGCAA          | <i>Bam</i> H I |
| ARF17-5  | CCCTCGAGATGAGGCTTTCGTCGTCGTC                        | <i>Xho</i> I   |
| ARF17-6  | GGACTAGTACGAATTCAACTGAGCCGACAGATGCAA                | <i>Spe</i> I   |
| ARF17-7  | CGACTCTAGGAGCTCGGTACCCGGGATGAGGCTTTCGTCGTCGTC       | <i>Sma</i> I   |
| ARF17-8  | GAACATCGTATGGGTACATACTAGTGAATTCAACTGAGCCGACAGATGCAA | <i>Spe</i> I   |
| ARF17-9  | GGATCAAGATGGGAACTCTG                                |                |
| ARF17-10 | TAGTCATCACAGCTGCTACC                                |                |
| ARF2-S   | CTGCTTCCAATTATTATCCAGTAC                            |                |
| ARF2-A   | TCAACCCTTTTCTGTTGGAATGC                             |                |
| ARF3-S   | TCAAAGATGCGCACACTGTC                                |                |
| ARF3-A   | CATGCAGCTTCGTGTATCAG                                |                |
| ARF11-S  | CCACTGAGAGTTAAGCATCC                                |                |
| ARF11-A  | GCATTAGGATCAGAGAAGCC                                |                |
| ARF15-S  | ATGGACAGTTGGACAAGCAC                                |                |
| ARF15-A  | TCAGAATCATCAGTCCCTCC                                |                |
| IAA6-S   | AGCTTGGTCTTCTGGTTTTAT                               |                |

|         |                                |  |
|---------|--------------------------------|--|
| IAA6-A  | CACCTTTGCATTGGCATTATC          |  |
| IAA9-S  | AAGAAAATGGCCAATGATGATCA        |  |
| IAA9-A  | CCCATCACCATCCTCGTAGGT          |  |
| IAA24-S | GGCTTGTGCTCTTCGTTGCT           |  |
| IAA24-A | CCTCTTGGATTCAGAAACACTGAA       |  |
| IAA27-S | TCAGGGCACACCGCAACTA            |  |
| IAA27-A | TAGGGTACTCACGGCAGAAGAAA        |  |
| BAK1-S  | GAGTTGATCTTGGGAATGCTGC         |  |
| BAK1-A  | CACTAGGTATCGTTCCGCTTATGTT      |  |
| D2-S    | CACTCCTTTTGGTGGTGGGC           |  |
| D2-A    | GGTGGGGAAGTTGACGATGTG          |  |
| D3-S    | AAGCCGGTTTATCCAATTCC           |  |
| D3-A    | GCAC CAAGAATCGTCTGGAT          |  |
| D4-S    | AGTCGCGTGCTGCCATTCTCGGAGTAATAG |  |
| D4-A    | AGCAAGCTCAGCAAGAGGTCCAGGATTTGC |  |
| D14-S   | GTGCTGTTCGCATGGCTTC            |  |
| D14-A   | GCAGGTCGTCG ACGTAGG            |  |
| D17-S   | CATCTTCTCCGACGACCACG           |  |
| D17-A   | CGTCTCCACGAACCTGCAT            |  |
| D27-S   | TCTGGGCTAAAGAATGAAAAGGA        |  |
| D27-A   | AGAGCTTGGGTCACAATCTCG          |  |
| LAZY1-S | CACAGGAAAGTCTACCCCGAG          |  |
| LAZY1-A | GGCTCATAAACACCAATCACATC        |  |
| LIC1-S  | ATGCAGACAACAAATTC              |  |
| LIC1-A  | GCAACTAATATTGGACCGCTA          |  |
| TAC1-S  | GAGATGGCTCTAAAGGTGTTC          |  |
| TAC1-A  | CGTGCCAATTGCAAGTATACC          |  |
